# Supplementary material for: Systematic review of pragmatic randomised control trials assessing the effectiveness of professional pharmacy services in community pharmacies
Source: PubMed Central journal article supplement (PMC7890900; doi:10.1186/s12913-021-06150-8), 2021-02-17
Supplement: 12913_2021_6150_MOESM1_ESM.pdf [file 12913_2021_6150_MOESM1_ESM.pdf]

**ADDITIONAL FILE 1-** The complete assessment of pragmatic degree of trials using of PRECIS 2-tool

|                   | 1.Eligibility | 2.Recruitment | 3.Setting | 4.Organisation | 5.Flexibility (delivery) | 6.Flexibility (adherence) | 7.Follow-up | 8.Primary outcome | 9.Primary analysis | Total/45 | Average |
|-------------------|---------------|---------------|-----------|----------------|--------------------------|---------------------------|-------------|-------------------|--------------------|----------|---------|
| [68] Elliot       | 5             | 4             | 5         | 5              | 4.5                      | 4                         | 5           | 4                 | 5                  | 41.5     | 4,55    |
| [76] Zillich      | 5             | 4             | 5         | 5              | 4                        | 5                         | 5           | 5                 | 1                  | 39       | 4,33    |
| [74] Tsuyuki      | 4             | 2             | 5         | 3              | 5                        | 5                         | 3           | 4                 | 5                  | 36       | 4,00    |
| [75] Verdoorn     | 4             | 4             | 5         | 4              | 3                        | 4                         | 4           | 3                 | 5                  | 36       | 4,00    |
| [73] Tommelein    | 2             | 5             | 5         | 4              | 4                        | 4                         | 4           | 2                 | 5                  | 35       | 3,88    |
| [71] Rubio-Valera | 3             | 3             | 5         | 4              | 3                        | 4                         | 4           | 3                 | 5                  | 34       | 3,77    |
| [49] Costello     | 5             | 5             | 5         | 2              | 5                        | 1                         | 3           | 5                 | 1                  | 32       | 3,55    |
| [67] Al Hamarneh  | 3             | 3             | 4         | 2              | 4                        | 3                         | 4           | 2                 | 5                  | 30       | 3,33    |
| [72] Stewart      | 2             | 2             | 4         | 2              | 4                        | 2                         | 1           | 5                 | 5                  | 28       | 3,00    |
| [51] Armour       | 2             | 4             | 4         | 2              | 2                        | 1                         | 2           | 4                 | 5                  | 26       | 2,88    |
| [70] Planas       | 3             | 1             | 5         | 1              | 3                        | 4                         | 3           | 2                 | 3                  | 25       | 2,77    |
| [69] Geurts       | 4             | 3             | 3         | 2              | 2                        | 3                         | 4           | 2                 | 1                  | 24       | 2,66    |
| Total/45          | 42            | 40            | 55        | 36             | 43.5                     | 40                        | 42          | 41                | 46                 |          |         |
| Average           | 3,5           | 3,33          | 4,58      | 3,00           | 3,58                     | 3,33                      | 3,50        | 3,41              | 3,83               |          |         |
